# Supplementary material for: High Hydrostatic Pressure Treatment of Oysters (Crassostrea gigas)—Impact on Physicochemical Properties, Texture Parameters, and Volatile Flavor Compounds
Source: MDPI journal article supplement (doi:10.3390/molecules26195731), 2021-09-22
Supplement: s1 [file s1]

# High hydrostatic pressure treatment of oysters (*Crassostrea gigas*) – IMPact on physicochemical properties, texture parameters and volatile flavor compounds

Yuyang Ma<sup>1</sup>, Runfang Wang<sup>1</sup>, Tietao Zhang<sup>2</sup>, Yunsheng Xu<sup>2</sup>, Suisui Jiang<sup>1</sup> and Yuanhui Zhao<sup>1\*</sup>

<sup>1</sup> College of Food Science and Engineering, Ocean University of China, Qingdao, Shandong 266003, China

<sup>2</sup> College of Food Science and Engineering, Hainan Tropical Ocean University, Sanya, Hainan 572022, China

**\*Correspondence:** zhaoyuanhui@ouc.edu.cn; Tel./Fax: +86-532-82032783

## Supplementary Table.

**Table S1.** Electronic nose sensor and application

| Array number | Sensor name | Performance description                      |
|--------------|-------------|----------------------------------------------|
| 1            | S1          | Aromatic compounds                           |
| 2            | S2          | Nitrogen oxide                               |
| 3            | S3          | Triterpenes                                  |
| 4            | S4          | Organic acid esters                          |
| 5            | S5          | Terpenes, esters                             |
| 6            | S6          | Sterols                                      |
| 7            | S7          | Oxygen derivatives of aliphatic hydrocarbons |
| 8            | S8          | Amines                                       |
| 9            | S9          | Hydrogen                                     |
| 10           | S10         | Furans                                       |
| 11           | S11         | VOC                                          |
| 12           | S12         | Sulfide                                      |
| 13           | S13         | Ethylene                                     |
| 14           | S14         | Lactones, pyrazines                          |
